# Supplementary material
Source: PubMed Central journal article supplement (PMC10561541)
Supplement: NIHMS1927728-supplement-Appendix.pdf [file NIHMS1927728-supplement-Appendix.pdf]

Table A1. Summary of patient characteristics and datasets used in study. GTV=gross tumor volume, RT=radiation therapy, SIB=simultaneous integrated boost, fx=fraction

|                                                                               |                                        |
|-------------------------------------------------------------------------------|----------------------------------------|
| <b>No. of Patients:</b>                                                       | 10                                     |
| <b>Age: Median (Range)</b>                                                    | 65.5 (60 – 78) y.o.                    |
| <b>Gender:</b>                                                                | 3 female<br>7 male                     |
| <b>RT Prescription:</b>                                                       | 50/25Gy, in 5fx (SIB)                  |
| <b>Location of GTV:</b>                                                       | 3 pancreatic head<br>7 pancreatic body |
| <b>Size of GTV: Median (Range)</b>                                            | 3.2 (1.3 – 4.5) cm                     |
| <b>Compression Belt Pressure: Median (Range)</b>                              | 32.5 (25 – 40) mm Hg                   |
| <b>Cine at Simulation:</b>                                                    | Yes, 10/10 patients                    |
| <b>Cine for Position Verification:</b>                                        | Yes, 10/10 patients; 5 fx/patient      |
| <b>Beam-on Cine:</b>                                                          | Yes, 10/10 patients; 5 fx/patient      |
| <b>Cine Scan Planes:</b>                                                      | Axial, Coronal, Sagittal               |
| <b>Total Number of Cine Acquisitions Included in Analysis for this Study:</b> | 330                                    |

Table A2. Median (range) value of modeling parameters estimated from measurements in our patient population. For rhythmic segmentation the wavelength can be calculated based on length of organ (in reference XCAT: small intestine length is ~4m, large intestine length is ~1.5m) and number of nodal points. Since the number of nodal points cannot be measured in 2D cine MRI, we instead report the period of the segmentation wave. In 22/50 fractions, some motility was observed but measurements not possible because of respiratory motion or susceptibility artifacts.  $A$  = amplitude,  $c$  = wave speed,  $\lambda$  = wavelength,  $T$  = period,  $s_b$  = bolus size,  $X$  = not observed,  $RS$  = rhythmic segmentations,  $HAPC$  = high amplitude propagating contractions,  $TC$  = tonic contractions

|                        | <b>Peristalsis</b>                                                                                                                                       | <b>RS</b>                                                                | <b>HAPC</b>                                                                                                    | <b>TC</b> |
|------------------------|----------------------------------------------------------------------------------------------------------------------------------------------------------|--------------------------------------------------------------------------|----------------------------------------------------------------------------------------------------------------|-----------|
| <b>Esophagus</b>       | X                                                                                                                                                        | X                                                                        | X                                                                                                              | X         |
| <b>Stomach</b>         | $A = 0.7 (0.4 - 1.6) \text{ cm}$<br>$T = 24 (5.5 - 41) \text{ sec}$<br>$c = 0.3 (0.1 - 1.25) \text{ cm/sec}$<br>$\lambda = 5.5 (1.65 - 32.5) \text{ cm}$ | $A = 0.8 (0.8 - 0.8) \text{ cm}$<br>$T = 23.5 (23.5 - 23.5) \text{ sec}$ | X                                                                                                              | X         |
| <b>Small Intestine</b> | $A = 0.4 (0.3 - 0.6) \text{ cm}$<br>$T = 20 (6 - 129) \text{ sec}$<br>$c = 0.6 (0.2 - 1.1) \text{ cm/sec}$<br>$\lambda = 9.6 (2.8 - 132) \text{ cm}$     | $A = 0.4 (0.3 - 0.6) \text{ cm}$<br>$T = 9.5 (6 - 38) \text{ sec}$       | X                                                                                                              | X         |
| <b>Large Intestine</b> | X                                                                                                                                                        | X                                                                        | $A = 0.8 (0.6 - 0.9) \text{ cm}$<br>$c = 1.6 (0.2 - 1.9) \text{ cm/sec}$<br>$s_b = 1.6 (1.2 - 1.8) \text{ cm}$ | X         |
| <b>Rectum</b>          | X                                                                                                                                                        | X                                                                        | X                                                                                                              | X         |

Table A3. Timing and wave parameters for simulation of peristaltic wave in the presence of large respiratory motion. The respiratory amplitude represents the upper adjacent values of target displacement reported in our previous work (reference 34 in the manuscript).  $\Delta V$  is the change in left ventricle volume (i.e. the ratio of volumes) from diastole to systole.

|                                                          |                    |
|----------------------------------------------------------|--------------------|
| <b>Respiratory Period</b>                                | 4.0 sec            |
| <b>Respiratory Amplitude (SI / AP / LR)</b>              | 1.0 / 0.4 / 0.0 cm |
| <b>Heart Period</b>                                      | 1.0 sec            |
| <b>Heart LV <math>\Delta V</math> (diastole/systole)</b> | 2.6                |
| <b>Peristalsis Amplitude</b>                             | 0.4 cm             |
| <b>Peristalsis Wavelength</b>                            | 9.6 cm             |
| <b>Peristalsis Wave Speed</b>                            | 0.6 cm/sec         |

Table A4. Organ volumes in reference XCAT at  $t=0$  sec for simulation combining cardiac, respiratory, and peristaltic motion.

| <b>Organ</b>    | Volume [cm <sup>3</sup> ] |
|-----------------|---------------------------|
| Small Intestine | 781                       |
| Large Intestine | 764                       |
| Right Lung      | 1203                      |
| Left Lung       | 1211                      |
| Liver           | 2267                      |
| Pancreas        | 171                       |
| Stomach         | 133                       |
| Esophagus       | 19                        |

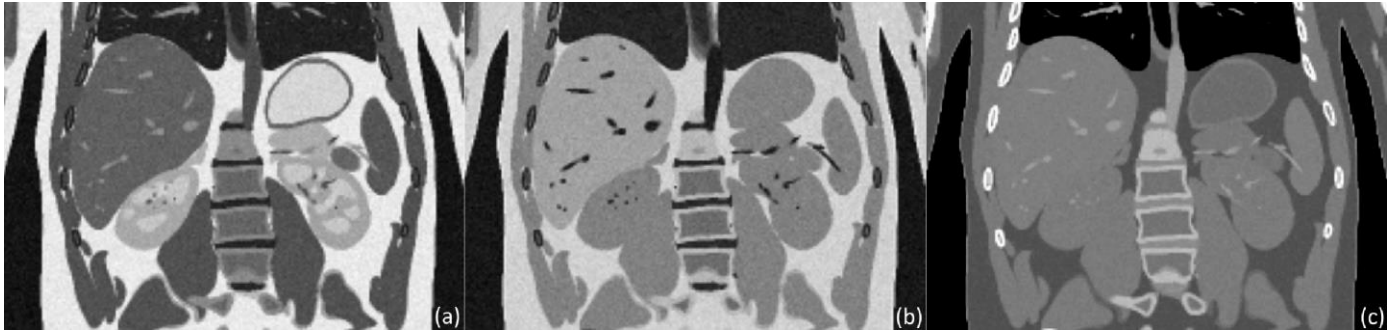

*Figure A1. A simulation of a set of multimodal acquisitions for (a) T2-weighted MRI, (b) T1-weighted MRI, (c) computed tomography.*

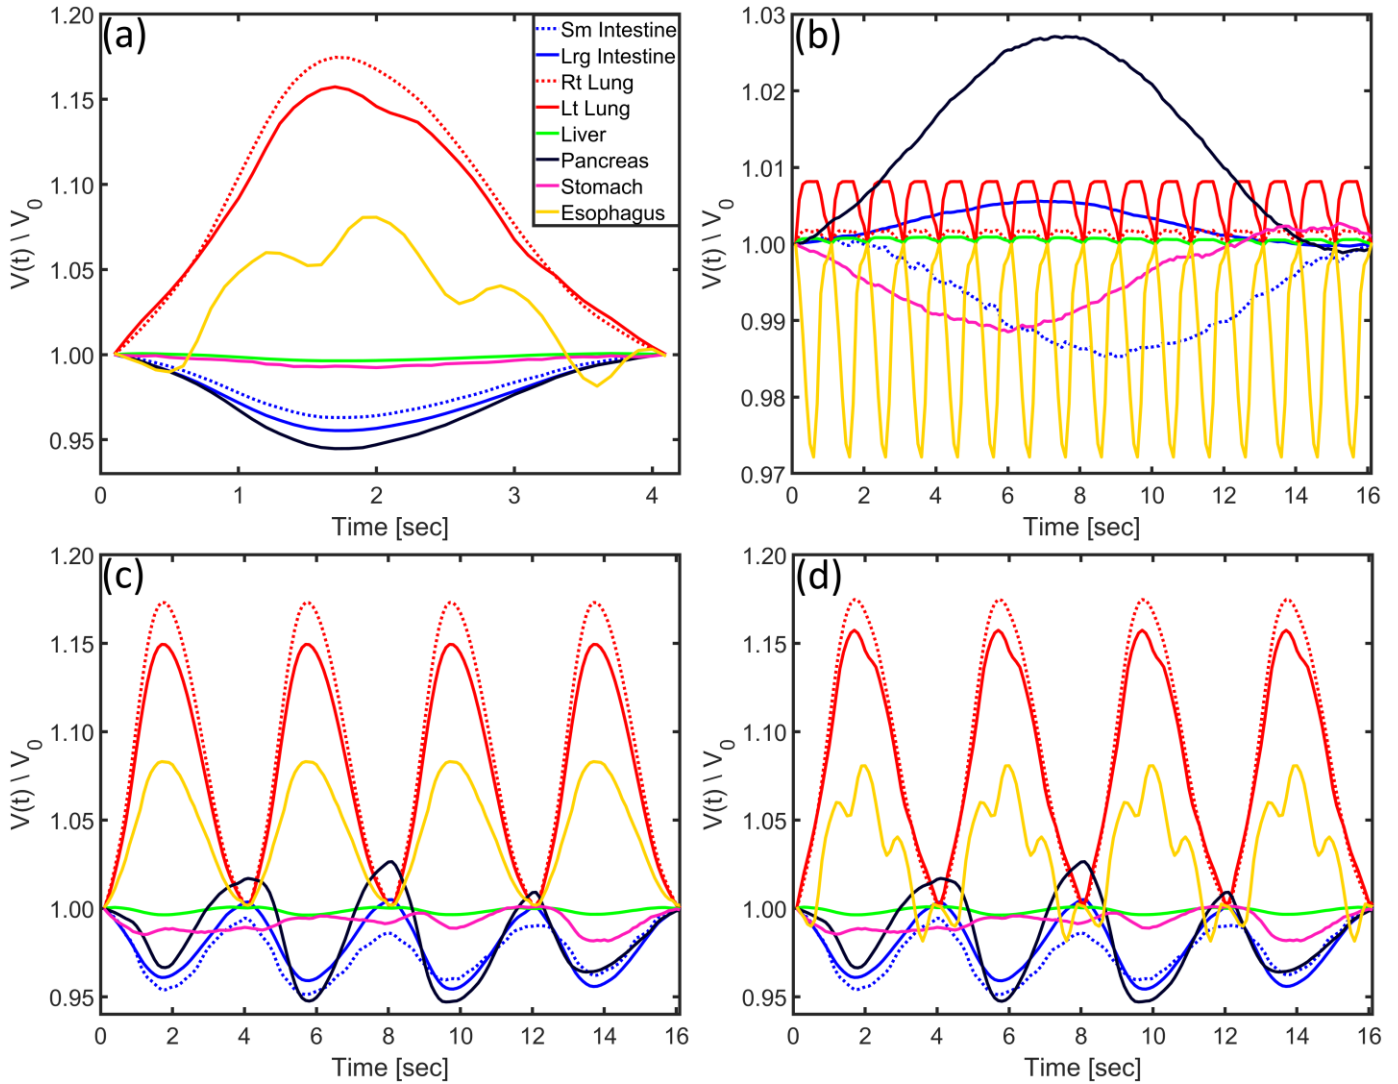

Figure A2. Example of the effect of peristaltic wave propagation combined with large-amplitude respiratory motion. A peristaltic wave was simulated using the parameters listed in Table A2. Change in organ volume in the presence of (a) only respiratory and cardiac motion, (b) only peristaltic and cardiac motion, (c) only peristaltic and respiratory motion, (d) peristaltic, respiratory, and cardiac motion. Organ volume is normalized to volume at first timepoint.
